# Supplementary material for: Correlations of Behavioral Deficits with Brain Pathology Assessed through Longitudinal MRI and Histopathology in the R6/1 Mouse Model of Huntington’s Disease
Source: PubMed Central journal article supplement (PMC3868608; doi:10.1371/journal.pone.0084726), 2013-12-19
Supplement: pone.0084726.s002.pdf [file pone.0084726.s002.pdf]

|            | Body weight |     |     |     |     | Body temperature |     |     |     |
|------------|-------------|-----|-----|-----|-----|------------------|-----|-----|-----|
|            | 6w          | 10w | 14w | 18w | 19w | 6w               | 10w | 14w | 18w |
| Male WT    | 11          | 11  | 11  | 11  | 11  | 11               | 11  | 11  | 11  |
| Male R61   | 9           | 9   | 9   | 9   | 9   | 9                | 9   | 9   | 9   |
| Female WT  | 10          | 10  | 10  | 10  | 10  | 10               | 10  | 10  | 10  |
| Female R61 | 10          | 10  | 10  | 8   | 8   | 10               | 10  | 10  | 8   |

|            | RR  | LMA |     | GS FL |     | GS 4L |     |
|------------|-----|-----|-----|-------|-----|-------|-----|
|            | 11w | 10w | 19w | 10w   | 19w | 10w   | 19w |
| Male WT    | 11  | 11  | 11  | 11    | 11  | 11    | 11  |
| Male R61   | 9   | 9   | 9   | 9     | 9   | 9     | 9   |
| Female WT  | 10  | 10  | 10  | 10    | 10  | 10    | 10  |
| Female R61 | 10  | 9   | 8   | 10    | 8   | 10    | 8   |

|            | TM CL |     | TM CR |     | FC CS | FC CT | OD  | SI  |
|------------|-------|-----|-------|-----|-------|-------|-----|-----|
|            | 6w    | 15w | 6w    | 15w | 12w   | 12w   | 10w | 10w |
| Male WT    | 10    | 11  | 10    | 10  | 11    | 11    | 11  | 10  |
| Male R61   | 9     | 9   | 9     | 8   | 9     | 9     | 8   | 9   |
| Female WT  | 10    | 10  | 10    | 10  | 7     | 8     | 9   | 10  |
| Female R61 | 10    | 9   | 10    | 9   | 8     | 7     | 8   | 10  |

|            | STR |     | CTX |     | HIPPI |     | CC |     | WB |     |
|------------|-----|-----|-----|-----|-------|-----|----|-----|----|-----|
|            | 9w  | 17w | 9w  | 17w | 9w    | 17w | 9w | 17w | 9w | 17w |
| Male WT    | 11  | 11  | 11  | 11  | 11    | 11  | 11 | 11  | 11 | 11  |
| Male R61   | 9   | 9   | 9   | 9   | 9     | 9   | 9  | 9   | 9  | 9   |
| Female WT  | 10  | 10  | 10  | 10  | 10    | 10  | 10 | 10  | 10 | 10  |
| Female R61 | 10  | 9   | 10  | 9   | 10    | 9   | 10 | 9   | 10 | 9   |

|            | STR |     | CTX |     | HIPPI |     | CC |     | MUSC |     |
|------------|-----|-----|-----|-----|-------|-----|----|-----|------|-----|
|            | 9w  | 17w | 9w  | 17w | 9w    | 17w | 9w | 17w | 9w   | 17w |
| Male WT    | 11  | 11  | 11  | 11  | 11    | 11  | 11 | 11  | 10   | 11  |
| Male R61   | 9   | 9   | 9   | 9   | 9     | 9   | 9  | 9   | 9    | 9   |
| Female WT  | 10  | 9   | 8   | 10  | 10    | 9   | 10 | 9   | 10   | 10  |
| Female R61 | 10  | 9   | 10  | 9   | 10    | 9   | 10 | 8   | 10   | 9   |

|            | Total mHTT |     |    |     |     | Nuclear inclusions |     |    |     |     |     |
|------------|------------|-----|----|-----|-----|--------------------|-----|----|-----|-----|-----|
|            | STR        | CTX | DG | CA1 | CA2 | STR                | CTX | DG | CA1 | CA2 | CA3 |
| Male R61   | 9          | 9   | 9  | 9   | 8   | 9                  | 9   | 9  | 8   | 9   | 9   |
| Female R61 | 9          | 8   | 8  | 9   | 9   | 9                  | 9   | 8  | 8   | 7   | 9   |

|            | STR |    |     | M1 CTX |    |     | CTX THICK |    |
|------------|-----|----|-----|--------|----|-----|-----------|----|
|            | Nu  | No | Vol | Nu     | No | Vol | M1        | S1 |
| Male WT    | 10  | 10 | 10  | 10     | 10 | 10  | 9         | 9  |
| Male R61   | 9   | 9  | 9   | 8      | 8  | 8   | 8         | 9  |
| Female WT  | 10  | 10 | 10  | 10     | 10 | 10  | 10        | 9  |
| Female R61 | 9   | 9  | 9   | 9      | 9  | 9   | 9         | 9  |

Animal(s) lost due to death  
 Animal(s) lost due to data removal/technical error  
 Animal(s) lost due to both death and data removal/technical error
