# Supplementary material for: Correlations of Behavioral Deficits with Brain Pathology Assessed through Longitudinal MRI and Histopathology in the R6/1 Mouse Model of Huntington’s Disease
Source: PubMed Central journal article supplement (PMC3868608; doi:10.1371/journal.pone.0084726), 2013-12-19
Supplement: pone.0084726.s003.pdf [file pone.0084726.s003.pdf]

**Physiological measures**

|                       | Body Weight                |         | Body temp                |         |
|-----------------------|----------------------------|---------|--------------------------|---------|
|                       | F                          | Sig.    | F                        | Sig.    |
| G'type                | 16.786 <sub>(1,195)</sub>  | p<0.001 | 5.768 <sub>(1,157)</sub> | p=0.018 |
| Gender                | 175.645 <sub>(1,195)</sub> | p<0.001 | 8.152 <sub>(1,157)</sub> | p=0.005 |
| Age                   | 35.056 <sub>(4,195)</sub>  | p<0.001 | 4.678 <sub>(3,157)</sub> | p=0.004 |
| G'type X Gender       | 0.845 <sub>(1,195)</sub>   | p=0.359 | 0.18 <sub>(1,157)</sub>  | p=0.672 |
| G'type X Age          | 6.173 <sub>(4,195)</sub>   | p<0.001 | 0.293 <sub>(3,157)</sub> | p=0.83  |
| Gender X Age          | 1.629 <sub>(4,195)</sub>   | p=0.169 | 0.574 <sub>(3,157)</sub> | p=0.633 |
| G'type X Gender X Age | 0.605 <sub>(4,195)</sub>   | p=0.659 | 0.839 <sub>(3,157)</sub> | p=0.475 |

**Lognitudinal behaviors**

|                       | LMA                     |         | GS FL                   |         | GS 4L                    |         | TM CL                    |         | TM CR                   |         |
|-----------------------|-------------------------|---------|-------------------------|---------|--------------------------|---------|--------------------------|---------|-------------------------|---------|
|                       | F                       | Sig.    | F                       | Sig.    | F                        | Sig.    | F                        | Sig.    | F                       | Sig.    |
| G'type                | 7.296 <sub>(1,78)</sub> | p=0.009 | 6.588 <sub>(1,77)</sub> | p=0.012 | 17.888 <sub>(1,77)</sub> | p<0.001 | 5.066 <sub>(1,77)</sub>  | p=0.028 | 3.246 <sub>(1,75)</sub> | p=0.076 |
| Gender                | 1.378 <sub>(1,78)</sub> | p=0.244 | 2.651 <sub>(1,77)</sub> | p=0.108 | 15.784 <sub>(1,77)</sub> | p<0.001 | 1.336 <sub>(1,77)</sub>  | p=0.252 | 0.206 <sub>(1,75)</sub> | p=0.651 |
| Age                   | 9.201 <sub>(1,78)</sub> | p=0.003 | 3.248 <sub>(1,77)</sub> | p=0.076 | 0.31 <sub>(1,77)</sub>   | p=0.861 | 18.395 <sub>(1,77)</sub> | p<0.001 | 0.002 <sub>(1,75)</sub> | p=0.964 |
| G'type X Gender       | 2.115 <sub>(1,78)</sub> | p=0.15  | 0.1 <sub>(1,77)</sub>   | p=0.752 | 1.033 <sub>(1,77)</sub>  | p=0.313 | 0.185 <sub>(1,77)</sub>  | p=0.668 | 0.348 <sub>(1,75)</sub> | p=0.557 |
| G'type X Age          | 0.443 <sub>(1,78)</sub> | p=0.508 | 6.721 <sub>(1,77)</sub> | p=0.012 | 13.107 <sub>(1,77)</sub> | p=0.001 | 2.663 <sub>(1,77)</sub>  | p=0.107 | 19.17 <sub>(1,75)</sub> | p<0.001 |
| Gender X Age          | 0.75 <sub>(1,78)</sub>  | p=0.784 | 3.523 <sub>(1,77)</sub> | p=0.065 | 1.913 <sub>(1,77)</sub>  | p=0.171 | 0.043 <sub>(1,77)</sub>  | p=0.837 | 0.48 <sub>(1,75)</sub>  | p=0.828 |
| G'type X Gender X Age | 0.519 <sub>(1,78)</sub> | p=0.474 | 0.256 <sub>(1,77)</sub> | p=0.614 | 2.093 <sub>(1,77)</sub>  | p=0.152 | 6.496 <sub>(1,77)</sub>  | p=0.013 | 0.735 <sub>(1,75)</sub> | p=0.394 |

**Behavior taken at a single time point**

|                 | RR                       |         | OD                      |         | SI                      |         | FC CR                   |         | FC CT                   |         |
|-----------------|--------------------------|---------|-------------------------|---------|-------------------------|---------|-------------------------|---------|-------------------------|---------|
|                 | F                        | Sig.    | F                       | Sig.    | F                       | Sig.    | F                       | Sig.    | F                       | Sig.    |
| G'type          | 20.794 <sub>(1,39)</sub> | p<0.001 | 0.349 <sub>(1,35)</sub> | p=0.559 | 0.253 <sub>(1,38)</sub> | p=0.618 | 5.59 <sub>(1,34)</sub>  | p=0.025 | 6.006 <sub>(1,34)</sub> | p=0.02  |
| Gender          | 4.062 <sub>(1,39)</sub>  | p=0.051 | 0.204 <sub>(1,35)</sub> | p=0.654 | 0.704 <sub>(1,38)</sub> | p=0.407 | 0.785 <sub>(1,34)</sub> | p=0.383 | 0.156 <sub>(1,34)</sub> | p=0.696 |
| Gender X G'type | 3.918 <sub>(1,39)</sub>  | p=0.055 | 0.046 <sub>(1,35)</sub> | p=0.832 | 0.626 <sub>(1,38)</sub> | p=0.434 | 0.218 <sub>(1,34)</sub> | p=0.644 | 0.004 <sub>(1,34)</sub> | p=0.951 |

**MRI - volumetry**

|                       | STR                      |         | CTX                      |         | HIPPI                    |         | CC                      |         | WB                       |         |
|-----------------------|--------------------------|---------|--------------------------|---------|--------------------------|---------|-------------------------|---------|--------------------------|---------|
|                       | F                        | Sig.    | F                        | Sig.    | F                        | Sig.    | F                       | Sig.    | F                        | Sig.    |
| G'type                | 26.481 <sub>(1,78)</sub> | p<0.001 | 61.667 <sub>(1,78)</sub> | p<0.001 | 64.687 <sub>(1,78)</sub> | p<0.001 | 2.819 <sub>(1,78)</sub> | p=0.098 | 79.172 <sub>(1,78)</sub> | p<0.001 |
| Gender                | 0.175 <sub>(1,78)</sub>  | p=0.677 | 0.367 <sub>(1,78)</sub>  | p=0.546 | 0.172 <sub>(1,78)</sub>  | p=0.68  | 0.036 <sub>(1,78)</sub> | p=0.851 | 0.613 <sub>(1,78)</sub>  | p=0.436 |
| Age                   | 0.133 <sub>(1,78)</sub>  | p=0.716 | 41.62 <sub>(1,78)</sub>  | p<0.001 | 2.667 <sub>(1,78)</sub>  | p=0.107 | 2.871 <sub>(1,78)</sub> | p=0.095 | 2.694 <sub>(1,78)</sub>  | p=0.105 |
| G'type X Gender       | 0.464 <sub>(1,78)</sub>  | p=0.498 | 0.033 <sub>(1,78)</sub>  | p=0.856 | 0.056 <sub>(1,78)</sub>  | p=0.814 | 4.032 <sub>(1,78)</sub> | p=0.048 | 0.138 <sub>(1,78)</sub>  | p=0.711 |
| G'type X Age          | 3.019 <sub>(1,78)</sub>  | p=0.087 | 5.224 <sub>(1,78)</sub>  | p=0.025 | 11.447 <sub>(1,78)</sub> | p=0.001 | 1.519 <sub>(1,78)</sub> | p=0.222 | 7.501 <sub>(1,78)</sub>  | p=0.008 |
| Gender X Age          | 1.291 <sub>(1,78)</sub>  | p=0.26  | 1.214 <sub>(1,78)</sub>  | p=0.274 | 0.099 <sub>(1,78)</sub>  | p=0.755 | 2.072 <sub>(1,78)</sub> | p=0.154 | 1.562 <sub>(1,78)</sub>  | p=0.215 |
| G'type X Gender X Age | 0.897 <sub>(1,78)</sub>  | p=0.347 | 0.016 <sub>(1,78)</sub>  | p=0.898 | 0.055 <sub>(1,78)</sub>  | p=0.815 | 5.002 <sub>(1,78)</sub> | p=0.028 | 0.01 <sub>(1,78)</sub>   | p=0.92  |

**MRI - T2 relaxivity**

|                       | STR                      |         | CTX                      |         | HIPPI                   |         | CC                      |         | MUSC                    |         |
|-----------------------|--------------------------|---------|--------------------------|---------|-------------------------|---------|-------------------------|---------|-------------------------|---------|
|                       | F                        | Sig.    | F                        | Sig.    | F                       | Sig.    | F                       | Sig.    | F                       | Sig.    |
| G'type                | 13.294 <sub>(1,77)</sub> | p=0.001 | 1.569 <sub>(1,78)</sub>  | p=0.215 | 0.519 <sub>(1,77)</sub> | p=0.474 | 4.403 <sub>(1,78)</sub> | p=0.04  | 0.023 <sub>(1,77)</sub> | p=0.88  |
| Gender                | 1.508 <sub>(1,77)</sub>  | p=0.224 | 0.186 <sub>(1,78)</sub>  | p=0.668 | 0.798 <sub>(1,77)</sub> | p=0.375 | 0.138 <sub>(1,78)</sub> | p=0.711 | 6.035 <sub>(1,77)</sub> | p=0.017 |
| Age                   | 9.459 <sub>(1,77)</sub>  | p=0.003 | 25.547 <sub>(1,78)</sub> | p<0.001 | 14.54 <sub>(1,77)</sub> | p<0.001 | 0.22 <sub>(1,78)</sub>  | p=0.641 | 0.378 <sub>(1,77)</sub> | p=0.541 |
| G'type X Gender       | 2.74 <sub>(1,77)</sub>   | p=0.102 | 1.346 <sub>(1,78)</sub>  | p=0.25  | 3.916 <sub>(1,77)</sub> | p=0.052 | 0.314 <sub>(1,78)</sub> | p=0.577 | 0.362 <sub>(1,77)</sub> | p=0.55  |
| G'type X Age          | 0.017 <sub>(1,77)</sub>  | p=0.897 | 1.081 <sub>(1,78)</sub>  | p=0.302 | 2.256 <sub>(1,77)</sub> | p=0.138 | 0.094 <sub>(1,78)</sub> | p=0.76  | 2.253 <sub>(1,77)</sub> | p=0.138 |
| Gender X Age          | 0.017 <sub>(1,77)</sub>  | p=0.898 | 0.003 <sub>(1,78)</sub>  | p=0.955 | 0.138 <sub>(1,77)</sub> | p=0.711 | 0.749 <sub>(1,78)</sub> | p=0.39  | 0.286 <sub>(1,77)</sub> | p=0.594 |
| G'type X Gender X Age | 1.662 <sub>(1,77)</sub>  | p=0.202 | 3.194 <sub>(1,78)</sub>  | p=0.078 | 3.499 <sub>(1,77)</sub> | p=0.066 | 2.507 <sub>(1,78)</sub> | p=0.118 | 1.714 <sub>(1,77)</sub> | p=0.195 |

**Stereological measures**

|                 | STR                      |         |                         |         | M1 CTX                   |         |                         |         | CTX THICKNESS            |         |                          |         |
|-----------------|--------------------------|---------|-------------------------|---------|--------------------------|---------|-------------------------|---------|--------------------------|---------|--------------------------|---------|
|                 | No.                      |         | Dens.                   |         | No.                      |         | Dens.                   |         | M1                       |         | S1                       |         |
|                 | F                        | Sig.    | F                       | Sig.    | F                        | Sig.    | F                       | Sig.    | F                        | Sig.    | F                        | Sig.    |
| G'type          | 14.546 <sub>(1,37)</sub> | p=0.001 | 1.205 <sub>(1,37)</sub> | p=0.28  | 15.432 <sub>(1,36)</sub> | p<0.001 | 0.837 <sub>(1,36)</sub> | p=0.367 | 92.105 <sub>(1,35)</sub> | p<0.001 | 68.558 <sub>(1,35)</sub> | p<0.001 |
| Gender          | 0.17 <sub>(1,37)</sub>   | p=0.898 | 0.031 <sub>(1,37)</sub> | p=0.861 | 7.491 <sub>(1,36)</sub>  | p=0.01  | 3.102 <sub>(1,36)</sub> | p=0.087 | 0.001 <sub>(1,35)</sub>  | p=0.978 | 1.196 <sub>(1,35)</sub>  | p=0.282 |
| Gender X G'type | 0.535 <sub>(1,37)</sub>  | p=0.469 | 0.329 <sub>(1,37)</sub> | p=0.57  | 0.55 <sub>(1,36)</sub>   | p=0.463 | 0.466 <sub>(1,36)</sub> | p=0.5   | 0.055 <sub>(1,35)</sub>  | p=0.816 | 1.347 <sub>(1,35)</sub>  | p=0.254 |
