# Supplementary material for: Correlations of Behavioral Deficits with Brain Pathology Assessed through Longitudinal MRI and Histopathology in the R6/1 Mouse Model of Huntington’s Disease
Source: PubMed Central journal article supplement (PMC3868608; doi:10.1371/journal.pone.0084726), 2013-12-19
Supplement: pone.0084726.s004.pdf [file pone.0084726.s004.pdf]

|                 |       | RR     | LMA    | GS FL  | GS 4L  | TM CL  | TM CR  | FC CS  | FC CT  | OD     | SI     |                   |
|-----------------|-------|--------|--------|--------|--------|--------|--------|--------|--------|--------|--------|-------------------|
| WT males        | RR    |        | 0.337  | -0.265 | 0.116  | -0.058 | 0.033  | 0.456  | -0.182 | -0.537 | -0.631 | WT females        |
|                 | LMA   | 0.62   |        | -0.077 | -0.332 | -0.281 | -0.506 | 0.745  | -0.05  | -0.14  | -0.113 |                   |
|                 | GS FL | -0.014 | 0.078  |        | 0.387  | -0.676 | 0.127  | 0.4    | -0.247 | 0.22   | -0.275 |                   |
|                 | GS 4L | 0.22   | 0.113  | 0.413  |        | -0.362 | -0.116 | 0.003  | 0.207  | -0.091 | -0.446 |                   |
|                 | TM CL | -0.704 | -0.531 | 0.345  | -0.074 |        | 0.379  | -0.347 | -0.293 | -0.435 | 0.595  |                   |
|                 | TM CR | 0.095  | 0.099  | -0.199 | -0.187 | -0.396 |        | 0.163  | -0.643 | -0.076 | -0.018 |                   |
|                 | FC CS | -0.055 | 0.02   | 0.301  | 0.508  | 0.367  | -0.521 |        | 0.05   | 0.18   | -0.637 |                   |
|                 | FC CT | 0.364  | -0.145 | -0.292 | 0.179  | -0.177 | -0.004 | 0.448  |        | 0.631  | -0.196 |                   |
|                 | OD    | 0.462  | 0.123  | 0.065  | 0.425  | 0.011  | -0.461 | 0.303  | 0.442  |        | -0.161 |                   |
|                 | SI    | -0.348 | -0.145 | 0.192  | 0.485  | 0.466  | -0.748 | 0.555  | -0.065 | 0.542  |        |                   |
| R6/1 males      | RR    |        | -0.523 | -0.32  | 0.059  | 0.061  | -0.143 | 0.031  | -0.052 | -0.61  | 0.195  | R6/1 females      |
|                 | LMA   | 0.005  |        | 0.135  | -0.146 | 0.051  | 0.201  | -0.689 | -0.262 | -0.147 | 0.034  |                   |
|                 | GS FL | -0.137 | 0.167  |        | 0.829  | -0.096 | -0.185 | 0.169  | 0.05   | -0.001 | -0.122 |                   |
|                 | GS 4L | 0.268  | 0.264  | 0.562  |        | 0.111  | -0.067 | 0.23   | -0.252 | 0.116  | -0.09  |                   |
|                 | TM CL | -0.195 | 0.741  | -0.131 | -0.165 |        | 0.118  | -0.238 | -0.869 | 0.408  | 0.334  |                   |
|                 | TM CR | 0.218  | 0.339  | -0.073 | 0.602  | -0.082 |        | -0.637 | -0.618 | -0.059 | 0.381  |                   |
|                 | FC CS | -0.081 | -0.492 | 0.013  | -0.287 | -0.203 | -0.455 |        | 0.633  | 0.607  | -0.134 |                   |
|                 | FC CT | 0.005  | 0.43   | -0.527 | -0.14  | 0.352  | 0.187  | 0.029  |        | -0.211 | -0.301 |                   |
|                 | OD    | 0.059  | 0.43   | -0.365 | -0.176 | 0.126  | 0.615  | -0.229 | 0.516  |        | -0.176 |                   |
|                 | SI    | -0.579 | 0.061  | -0.261 | -0.567 | 0.087  | 0.071  | 0.038  | 0.177  | 0.69   |        |                   |
| WT & R6/1 males | RR    |        | 0.362  | -0.161 | 0.345  | 0.104  | 0.245  | 0.321  | 0.312  | -0.441 | -0.363 | WT & R6/1 females |
|                 | LMA   | 0.525  |        | 0.025  | -0.08  | -0.044 | -0.084 | 0.088  | 0.221  | -0.191 | -0.133 |                   |
|                 | GS FL | -0.061 | 0.095  |        | 0.556  | -0.243 | -0.047 | 0.153  | -0.095 | 0.129  | -0.197 |                   |
|                 | GS 4L | 0.108  | 0.058  | 0.482  |        | 0.003  | 0.061  | 0.234  | 0.269  | -0.058 | -0.331 |                   |
|                 | TM CL | -0.585 | -0.15  | 0.074  | -0.039 |        | 0.222  | -0.138 | -0.298 | 0.118  | 0.359  |                   |
|                 | TM CR | 0.183  | 0.236  | -0.137 | 0.179  | -0.292 |        | -0.383 | -0.414 | -0.138 | 0.105  |                   |
|                 | FC CS | 0.123  | 0.034  | 0.139  | 0.014  | -0.166 | -0.345 |        | 0.521  | 0.355  | -0.153 |                   |
|                 | FC CT | 0.363  | 0.213  | -0.373 | -0.051 | -0.125 | 0.12   | 0.396  |        | 0.186  | -0.193 |                   |
|                 | OD    | 0.268  | 0.179  | -0.13  | 0.146  | 0.08   | -0.029 | 0.038  | 0.363  |        | -0.173 |                   |
|                 | SI    | -0.144 | 0.162  | -0.075 | -0.282 | -0.028 | -0.179 | 0.403  | 0.219  | 0.527  |        |                   |

Pearson r value >0.5 >0.6 >0.7 >0.8
