# Supplementary material for: Correlations of Behavioral Deficits with Brain Pathology Assessed through Longitudinal MRI and Histopathology in the R6/1 Mouse Model of Huntington’s Disease
Source: PubMed Central journal article supplement (PMC3868608; doi:10.1371/journal.pone.0084726), 2013-12-19
Supplement: pone.0084726.s005.pdf [file pone.0084726.s005.pdf]

|                    |       | LMA    | GS FL  | GS 4L  | TM CL  | TM CR   |                      |  |
|--------------------|-------|--------|--------|--------|--------|---------|----------------------|--|
| WT<br>males        | LMA   |        | -0.333 | 0.213  | -0.125 | -0.041  | WT<br>females        |  |
|                    | GS FL | 0.534  |        | 0.223  | 0.653  | 0.35    |                      |  |
|                    | GS 4L | 0.437  | 0.762  |        | 0.588  | -0.306  |                      |  |
|                    | TM CL | -0.08  | 0.056  | 0.016  |        | -0.092  |                      |  |
|                    | TM CR | 0.28   | -0.118 | 0.026  | 0.291  |         |                      |  |
| R6/1<br>males      | LMA   |        | -0.447 | 0.461  | -0.507 | -0.799  | R6/1<br>females      |  |
|                    | GS FL | -0.27  |        | 0.108  | -0.335 | 0.578   |                      |  |
|                    | GS 4L | -0.733 | 0.556  |        | -0.195 | -0.541  |                      |  |
|                    | TM CL | 0.09   | 0.268  | -0.122 |        | 0.173   |                      |  |
|                    | TM CR | 0.089  | 0.459  | 0.017  | 0.556  |         |                      |  |
| WT & R6/1<br>males | LMA   |        | -0.311 | 0.176  | -0.229 | -0.344  | WT & R6/1<br>females |  |
|                    | GS FL | 0.463  |        | 0.565  | -0.388 | -0.067  |                      |  |
|                    | GS 4L | 0.279  | 0.79*  |        | -0.433 | -0.669* |                      |  |
|                    | TM CL | -0.049 | 0.057  | -0.093 |        | 0.472   |                      |  |
|                    | TM CR | -0.212 | -0.279 | -0.383 | 0.542  |         |                      |  |

Pearson r value >0.5 >0.6 >0.7 >0.8
