# Supplementary material for: Correlations of Behavioral Deficits with Brain Pathology Assessed through Longitudinal MRI and Histopathology in the R6/1 Mouse Model of Huntington’s Disease
Source: PubMed Central journal article supplement (PMC3868608; doi:10.1371/journal.pone.0084726), 2013-12-19
Supplement: pone.0084726.s006.pdf [file pone.0084726.s006.pdf]

|                 |               | Volumetry |        |        |        |        | T2 relaxivity |        |        |        |        |        |
|-----------------|---------------|-----------|--------|--------|--------|--------|---------------|--------|--------|--------|--------|--------|
|                 |               | STR       | CTX    | HIPP   | CC     | WB     | STR           | CTX    | HIPP   | CC     | MUSC   |        |
| WT males        | Volumetry     | STR       |        | 0.419  | 0.102  | 0.221  | 0.316         | 0.355  | 0.414  | 0.528  | 0.198  | 0.143  |
|                 |               | CTX       | 0.382  |        | 0.137  | 0.412  | 0.47          | -0.164 | 0.045  | 0.242  | 0.003  | 0.252  |
|                 |               | HIPP      | -0.056 | 0.037  |        | 0.355  | 0.44          | 0.01   | 0.334  | 0.282  | -0.446 | -0.165 |
|                 |               | CC        | -0.063 | -0.212 | 0.033  |        | 0.529         | 0.136  | 0.27   | 0.165  | 0.304  | -0.032 |
|                 |               | WB        | 0.218  | 0.588  | 0.366  | -0.157 |               | -0.087 | 0.2    | 0.26   | -0.074 | 0.405  |
|                 | T2 relaxivity | STR       | -0.04  | -0.209 | 0.36   | 0.115  | -0.172        |        | 0.85*  | 0.666  | 0.414  | 0.203  |
|                 |               | CTX       | -0.047 | -0.291 | 0.199  | 0.071  | -0.379        | 0.862* |        | 0.887* | 0.08   | 0.019  |
|                 |               | HIPP      | 0      | -0.179 | -0.044 | 0.116  | -0.288        | 0.595  | 0.782* |        | -0.003 | 0.059  |
|                 |               | CC        | 0.08   | -0.312 | -0.114 | 0.028  | -0.447        | 0.463  | 0.372  | 0.469  |        | 0.298  |
|                 |               | MUSC      | -0.073 | -0.092 | 0.013  | -0.317 | 0             | 0.305  | 0.386  | 0.204  | 0.014  |        |
| R6/1 males      | Volumetry     | STR       |        | 0.501  | 0.481  | 0.124  | 0.352         | 0.177  | 0.195  | 0.126  | 0.146  | -0.21  |
|                 |               | CTX       | 0.371  |        | 0.549  | 0.455  | 0.708*        | -0.236 | -0.253 | -0.357 | -0.001 | -0.108 |
|                 |               | HIPP      | 0.14   | 0.475  |        | 0.354  | 0.693*        | 0.04   | 0.006  | 0.058  | -0.356 | 0.186  |
|                 |               | CC        | -0.002 | -0.417 | 0.041  |        | 0.272         | -0.291 | -0.396 | -0.266 | -0.1   | -0.004 |
|                 |               | WB        | 0.432  | 0.67   | 0.204  | -0.049 |               | -0.085 | -0.027 | -0.223 | -0.353 | 0.215  |
|                 | T2 relaxivity | STR       | -0.273 | -0.386 | -0.19  | 0.09   | -0.508        |        | 0.868* | 0.907* | 0.072  | -0.241 |
|                 |               | CTX       | -0.257 | -0.533 | -0.178 | 0.005  | -0.756*       | 0.849* |        | 0.854* | -0.017 | -0.022 |
|                 |               | HIPP      | 0.07   | -0.378 | -0.122 | 0.061  | -0.536        | 0.854* | 0.842* |        | 0.056  | -0.111 |
|                 |               | CC        | -0.483 | -0.456 | -0.239 | 0.286  | -0.111        | 0.009  | 0.089  | -0.216 |        | -0.16  |
|                 |               | MUSC      | -0.129 | -0.478 | -0.635 | 0.133  | 0.021         | 0.023  | 0.075  | -0.075 | 0.303  |        |
| WT & R6/1 males | Volumetry     | STR       |        | 0.564* | 0.438  | 0.155  | 0.487         | 0.333  | 0.276  | 0.167  | 0.226  | 0.028  |
|                 |               | CTX       | 0.607* |        | 0.599* | 0.302  | 0.757*        | -0.013 | -0.085 | -0.289 | 0.097  | 0.088  |
|                 |               | HIPP      | 0.435  | 0.513* |        | 0.231  | 0.754*        | 0.163  | 0.143  | -0.072 | -0.21  | 0.025  |
|                 |               | CC        | 0.209  | -0.023 | 0.263  |        | 0.272         | -0.037 | -0.029 | -0.021 | 0.2    | -0.025 |
|                 |               | WB        | 0.637* | 0.768* | 0.64*  | 0.199  |               | 0.084  | 0.081  | -0.207 | -0.024 | 0.267  |
|                 | T2 relaxivity | STR       | 0.207  | 0.069  | 0.401  | 0.262  | 0.175         |        | 0.846* | 0.682* | 0.3    | 0.012  |
|                 |               | CTX       | 0.029  | -0.203 | 0.17   | 0.119  | -0.186        | 0.837* |        | 0.811* | 0.043  | -0.001 |
|                 |               | HIPP      | 0.113  | -0.167 | 0.024  | 0.122  | -0.175        | 0.706* | 0.82*  |        | -0.026 | -0.047 |
|                 |               | CC        | 0.106  | -0.091 | 0.099  | 0.218  | 0.025         | 0.381  | 0.29   | 0.162  |        | 0.164  |
|                 |               | MUSC      | -0.143 | -0.311 | -0.279 | -0.107 | -0.068        | 0.07   | 0.158  | 0.004  | 0.096  |        |

Pearson r value >0.5 >0.6 >0.7 >0.8
