# Supplementary material for: Correlations of Behavioral Deficits with Brain Pathology Assessed through Longitudinal MRI and Histopathology in the R6/1 Mouse Model of Huntington’s Disease
Source: PubMed Central journal article supplement (PMC3868608; doi:10.1371/journal.pone.0084726), 2013-12-19
Supplement: pone.0084726.s007.pdf [file pone.0084726.s007.pdf]

|                                           |       | Males     |        |        |        |        |                |        |        |        |        | Females   |        |        |        |        |                |        |         |        |        |        |
|-------------------------------------------|-------|-----------|--------|--------|--------|--------|----------------|--------|--------|--------|--------|-----------|--------|--------|--------|--------|----------------|--------|---------|--------|--------|--------|
|                                           |       | Volumetry |        |        |        |        | T2 relaxometry |        |        |        |        | Volumetry |        |        |        |        | T2 relaxometry |        |         |        |        |        |
|                                           |       | STR       | CTX    | HIPP   | CC     | WB     | STR            | CTX    | HIPP   | CC     | MUSC   | STR       | CTX    | HIPP   | CC     | WB     | STR            | CTX    | HIPP    | CC     | MUSC   |        |
| Behaviour and MRI taken from 6 - 12 weeks | WTs   | RR        | 0.043  | 0.181  | 0.279  | 0.123  | -0.407         | 0.195  | 0.343  | 0.248  | 0.433  | -0.305    | 0.313  | 0.556  | 0.264  | 0.246  | 0.453          | -0.362 | -0.022  | -0.11  | -0.245 | 0.067  |
|                                           |       | LMA       | 0.292  | 0.231  | 0.047  | -0.113 | 0.016          | 0.206  | 0.512  | 0.705  | 0.354  | -0.206    | 0.323  | 0.271  | 0.14   | -0.043 | 0.499          | -0.046 | 0.093   | 0.408  | -0.092 | 0.482  |
|                                           |       | GS FL     | -0.148 | -0.457 | 0.18   | -0.031 | -0.174         | 0.223  | 0.359  | 0.423  | 0.439  | 0.289     | -0.085 | -0.059 | -0.493 | 0.414  | -0.101         | -0.179 | 0.37    | -0.323 | 0.194  | -0.113 |
|                                           |       | GS 4L     | -0.034 | 0.257  | 0.348  | -0.468 | 0.318          | -0.255 | -0.176 | 0.124  | 0.052  | 0.226     | 0.141  | 0.023  | -0.509 | -0.037 | 0.167          | -0.372 | 0.129   | -0.41  | 0.026  | -0.106 |
|                                           |       | TM CL     | -0.002 | -0.597 | -0.377 | -0.029 | -0.05          | -0.276 | -0.406 | -0.35  | 0.219  | 0.114     | -0.406 | -0.211 | 0.652  | -0.353 | -0.27          | 0.007  | -0.507  | -0.152 | -0.53  | -0.417 |
|                                           |       | TM CR     | 0.037  | 0.243  | 0.048  | 0.023  | -0.065         | -0.206 | 0.15   | -0.038 | -0.565 | -0.401    | -0.378 | -0.128 | 0.099  | 0.067  | -0.725         | 0.137  | -0.271  | -0.537 | 0.009  | -0.842 |
|                                           | R6/1s | FC CS     | 0.063  | 0.312  | 0.247  | -0.198 | 0.445          | 0.08   | -0.146 | 0.006  | 0.241  | -0.087    | 0.459  | -0.043 | -0.382 | -0.288 | -0.164         | 0.041  | -0.349  | -0.257 | 0.088  | -0.189 |
|                                           |       | FC CT     | 0.211  | 0.489  | 0.478  | 0.105  | 0.007          | 0.011  | -0.269 | -0.525 | 0.061  | -0.636    | 0.329  | -0.54  | -0.614 | -0.426 | -0.073         | 0.05   | -0.512  | -0.052 | 0.337  | 0.221  |
|                                           |       | OD        | 0.275  | -0.147 | 0.19   | -0.417 | -0.253         | 0.072  | -0.091 | -0.083 | 0.634  | -0.232    | 0.396  | -0.38  | -0.774 | -0.202 | -0.562         | 0.683  | -0.06   | 0.197  | 0.857  | 0.102  |
|                                           |       | SI        | 0.175  | -0.153 | -0.041 | -0.609 | 0.35           | 0.123  | -0.162 | 0.107  | 0.289  | 0.349     | -0.626 | -0.374 | 0.404  | -0.145 | -0.14          | 0.126  | -0.279  | 0.109  | -0.266 | -0.073 |
|                                           |       | RR        | -0.559 | 0.115  | 0.174  | -0.138 | -0.03          | 0.344  | 0.238  | 0.281  | 0.382  | -0.126    | -0.56  | -0.365 | 0.105  | 0.076  | -0.183         | 0.17   | -0.037  | 0.198  | 0.166  | 0.472  |
|                                           |       | LMA       | -0.409 | -0.689 | -0.415 | -0.08  | -0.497         | 0.699  | 0.575  | 0.517  | -0.377 | 0.201     | 0.375  | -0.076 | -0.313 | -0.001 | -0.22          | 0.127  | 0.243   | 0.101  | 0.168  | -0.361 |
| Behaviour and MRI taken from 15-19 weeks  | WTs   | GS FL     | -0.332 | -0.268 | -0.848 | -0.511 | -0.632         | 0.338  | 0.533  | -0.038 | 0.371  | 0.211     | 0.695  | 0.602  | 0.524  | -0.095 | 0.818          | 0.054  | 0.279   | 0.018  | -0.038 | 0.075  |
|                                           |       | GS 4L     | -0.141 | -0.296 | -0.7   | -0.706 | -0.225         | 0.069  | 0.377  | 0.033  | 0.052  | 0.493     | 0.582  | 0.626  | 0.582  | 0.105  | 0.762          | 0.142  | 0.288   | 0.11   | -0.039 | 0.309  |
|                                           |       | TM CL     | -0.198 | -0.183 | -0.131 | 0.08   | -0.14          | 0.58   | 0.294  | 0.612  | -0.535 | -0.256    | 0.474  | 0.088  | -0.012 | -0.019 | -0.201         | 0.189  | 0.288   | 0.064  | 0.126  | -0.305 |
|                                           |       | TM CR     | -0.017 | -0.408 | -0.131 | -0.161 | 0.148          | -0.19  | 0.082  | -0.134 | -0.234 | 0.519     | -0.043 | 0.014  | 0.213  | 0.295  | -0.102         | 0.513  | 0.606   | 0.67   | -0.21  | -0.403 |
|                                           |       | FC CS     | 0.299  | 0.695  | 0.345  | -0.324 | 0.036          | -0.164 | 0.143  | 0.207  | 0.253  | -0.551    | -0.158 | 0.096  | -0.297 | -0.297 | 0.203          | -0.827 | -0.827  | -0.838 | 0.232  | 0.455  |
|                                           |       | FC CT     | 0.317  | -0.227 | 0.364  | -0.028 | -0.055         | 0.076  | 0.133  | 0.471  | -0.493 | 0.061     | -0.548 | -0.262 | -0.369 | -0.208 | 0.049          | -0.59  | -0.714  | -0.534 | 0.174  | 0.526  |
|                                           | R6/1s | OD        | -0.178 | -0.426 | 0.334  | 0.417  | 0.05           | 0.016  | 0.068  | -0.123 | -0.168 | 0.196     | 0.377  | 0.401  | -0.216 | -0.304 | 0.048          | -0.55  | -0.398  | -0.616 | -0.067 | 0.064  |
|                                           |       | SI        | 0.173  | -0.277 | 0.301  | 0.627  | 0.171          | -0.269 | -0.277 | -0.379 | -0.103 | 0.136     | -0.13  | -0.512 | -0.198 | 0.035  | -0.363         | 0.2    | 0.223   | 0.3    | 0.515  | -0.508 |
|                                           |       | RR        | 0.117  | 0.343  | 0.389  | 0.225  | 0.057          | 0.432  | 0.467  | 0.422  | 0.548  | -0.204    | 0.173  | 0.502  | 0.449  | -0.219 | 0.489          | 0.018  | -0.088  | -0.275 | -0.08  | 0.375  |
|                                           |       | LMA       | 0.22   | 0.143  | 0.104  | 0.121  | 0.197          | 0.579  | 0.646  | 0.702* | 0.341  | -0.01     | 0.375  | 0.3    | 0.148  | -0.176 | 0.364          | 0.084  | 0.092   | 0.091  | -0.021 | 0.325  |
|                                           |       | GS FL     | -0.211 | -0.322 | -0.247 | -0.223 | -0.256         | 0.191  | 0.324  | 0.137  | 0.303  | 0.234     | 0.284  | 0.293  | 0.071  | 0.147  | 0.386          | -0.017 | 0.25    | -0.103 | 0.09   | -0.008 |
|                                           |       | GS 4L     | -0.223 | -0.125 | -0.213 | -0.597 | -0.079         | -0.214 | -0.079 | -0.081 | -0.103 | 0.395     | 0.344  | 0.445  | 0.158  | -0.171 | 0.548          | -0.014 | 0.134   | -0.255 | 0.018  | 0.195  |
| WTs & R6/1s                               | TM CL | -0.38     | -0.557 | -0.418 | -0.209 | -0.367 | -0.173         | -0.331 | -0.168 | -0.331 | -0.093 | 0.142     | 0.074  | 0.23   | -0.183 | -0.113 | 0.164          | 0.22   | -0.044  | -0.13  | -0.241 |        |
|                                           | TM CR | 0.108     | 0.087  | 0.056  | 0.038  | 0.106  | -0.036         | 0.193  | 0.032  | -0.273 | 0.108  | -0.141    | 0.148  | 0.294  | -0.034 | -0.124 | 0.397          | 0.287  | 0.052   | -0.059 | -0.407 |        |
|                                           | FC CS | 0.407     | 0.59   | 0.435  | 0.009  | 0.499  | 0.27           | 0.265  | 0.332  | 0.437  | -0.342 | 0.067     | 0.264  | -0.014 | -0.334 | 0.285  | -0.588         | -0.795 | -0.761* | 0.12   | 0.406  |        |
|                                           | FC CT | 0.412     | 0.372  | 0.53   | 0.216  | 0.237  | 0.274          | 0.156  | 0.147  | 0.135  | -0.243 | 0.185     | -0.064 | -0.168 | -0.523 | 0.244  | -0.143         | -0.448 | -0.37   | 0.282  | 0.501  |        |
|                                           | OD    | -0.025    | -0.255 | 0.183  | -0.089 | -0.152 | -0.013         | -0.055 | -0.112 | 0.273  | 0.033  | 0.361     | -0.038 | -0.51  | -0.139 | -0.295 | -0.122         | -0.321 | -0.246  | 0.471  | -0.02  |        |
|                                           | SI    | 0.402     | 0.1    | 0.312  | 0.068  | 0.452  | 0.204          | 0.122  | 0.127  | 0.319  | 0.156  | -0.467    | -0.404 | 0.102  | -0.036 | -0.242 | 0.135          | 0.123  | 0.208   | -0.051 | -0.246 |        |
| Behaviour and MRI taken from 15-19 weeks  | WTs   | LMA       | 0.262  | 0.52   | 0.526  | -0.309 | 0.408          | 0.03   | -0.051 | -0.303 | -0.163 | -0.005    | -0.42  | -0.103 | -0.228 | 0.328  | 0.415          | -0.035 | -0.008  | -0.101 | 0.33   | 0.211  |
|                                           |       | GS FL     | 0.311  | 0.302  | 0.631  | -0.393 | -0.007         | 0.62   | 0.622  | 0.292  | 0.247  | 0.542     | 0.578  | 0.506  | 0.708  | 0.129  | 0.529          | -0.457 | -0.282  | -0.213 | -0.108 | -0.053 |
|                                           |       | GS 4L     | 0.558  | 0.535  | 0.481  | -0.573 | 0.365          | 0.275  | 0.267  | 0.044  | 0.083  | 0.599     | 0.09   | 0.346  | 0.404  | 0.074  | 0.503          | -0.288 | 0.085   | 0.183  | -0.464 | -0.067 |
|                                           |       | TM CL     | -0.199 | -0.092 | -0.195 | -0.591 | -0.433         | -0.291 | -0.047 | -0.121 | -0.381 | 0.275     | 0.542  | 0.531  | 0.39   | 0.086  | 0.659          | -0.272 | 0.01    | 0.055  | -0.18  | 0.129  |
|                                           |       | TM CR     | -0.573 | 0.003  | 0.264  | -0.377 | 0.303          | -0.316 | -0.266 | -0.469 | -0.598 | 0.098     | 0.54   | 0.541  | 0.417  | 0.464  | 0.104          | -0.451 | -0.185  | -0.087 | 0.095  | -0.389 |
|                                           |       | LMA       | 0.264  | 0.108  | -0.164 | 0.636  | 0.325          | 0.554  | 0.255  | 0.431  | -0.109 | 0.365     | 0.309  | 0.15   | 0.781  | 0.622  | 0.101          | -0.766 | -0.796  | -0.432 | 0.049  | 0.416  |
|                                           | R6/1s | GS FL     | -0.42  | -0.471 | -0.077 | -0.214 | 0.29           | -0.436 | -0.525 | -0.489 | 0.436  | 0.169     | -0.061 | -0.152 | -0.282 | 0.125  | 0.272          | 0.587  | 0.38    | 0.199  | -0.087 | 0.136  |
|                                           |       | GS 4L     | -0.674 | -0.398 | 0.093  | -0.618 | -0.408         | -0.435 | -0.191 | -0.389 | 0.174  | -0.091    | -0.171 | 0.362  | 0.357  | 0.484  | 0.564          | -0.458 | -0.784  | -0.612 | -0.555 | 0.036  |
|                                           |       | TM CL     | 0.479  | -0.387 | -0.068 | 0.127  | 0.488          | 0.136  | -0.21  | 0.263  | 0.093  | -0.224    | -0.405 | 0.237  | -0.516 | -0.057 | -0.164         | -0.058 | 0.114   | 0.043  | -0.108 | -0.394 |
|                                           |       | TM CR     | -0.114 | -0.728 | -0.312 | 0.335  | 0.208          | -0.439 | -0.669 | -0.446 | 0.475  | 0.004     | 0.272  | 0.073  | -0.387 | -0.272 | -0.019         | 0.747  | 0.795   | 0.62   | 0.307  | -0.243 |
|                                           |       | LMA       | 0.464  | 0.562  | 0.503  | 0.144  | 0.553          | 0.35   | 0.047  | -0.046 | -0.095 | 0.071     | -0.097 | -0.014 | 0.145  | 0.333  | 0.145          | -0.303 | -0.384  | -0.224 | 0.232  | 0.284  |
|                                           |       | GS FL     | 0.401  | 0.49   | 0.64   | -0.116 | 0.481          | 0.391  | 0.144  | -0.138 | 0.292  | 0.257     | 0.545  | 0.561  | 0.566  | 0.335  | 0.675          | 0.173  | 0.055   | -0.224 | 0.058  | -0.127 |
| WTs & R6/1s                               | GS 4L | 0.436     | 0.593  | 0.637  | -0.288 | 0.555  | 0.199          | 0.031  | -0.246 | 0.138  | 0.163  | 0.487     | 0.729  | 0.776  | 0.408  | 0.816  | 0.013          | -0.2   | -0.387  | -0.101 | -0.212 |        |
|                                           | TM CL | 0.025     | -0.194 | -0.159 | -0.28  | -0.131 | -0.11          | -0.126 | 0.118  | -0.2   | 0.032  | -0.448    | -0.354 | -0.661 | -0.221 | -0.5   | -0.326         | -0.001 | 0.208   | -0.261 | 0.056  |        |
|                                           | TM CR | -0.607    | -0.687 | -0.556 | -0.315 | -0.491 | -0.497         | -0.323 | -0.18  | -0.182 | 0.097  | -0.172    | -0.321 | -0.563 | -0.117 | -0.48  | 0              | 0.324  | 0.445   | -0.051 | -0.088 |        |

Pearson r value >0.5 >0.6 >0.7 >0.8
