# Supplementary material for: Correlations of Behavioral Deficits with Brain Pathology Assessed through Longitudinal MRI and Histopathology in the R6/1 Mouse Model of Huntington’s Disease
Source: PubMed Central journal article supplement (PMC3868608; doi:10.1371/journal.pone.0084726), 2013-12-19
Supplement: pone.0084726.s008.pdf [file pone.0084726.s008.pdf]

|                      |            | Total mHTT |        |        |        |        |        | Nuc mHTT |        |        |        |        |        |        |
|----------------------|------------|------------|--------|--------|--------|--------|--------|----------|--------|--------|--------|--------|--------|--------|
|                      |            | STR        | CTX    | DG     | CA1    | CA2    | CA3    | STR      | CTX    | DG     | CA1    | CA2    | CA3    |        |
| R6/1 males           | Total mHTT | STR        |        | 0.552  | 0.73   | 0.641  | 0.644  | 0.712    | 0.617  | -0.392 | 0.602  | 0.561  | 0.649  | 0.595  |
|                      |            | CTX        | 0.769  |        | 0.193  | 0.233  | 0.008  | 0.526    | -0.268 | 0.228  | 0.215  | 0.516  | 0.626  | -0.06  |
|                      |            | DG         | 0.801  | 0.674  |        | 0.805  | 0.83   | 0.957*   | 0.625  | 0.054  | 0.405  | 0.665  | 0.95   | 0.795  |
|                      |            | CA1        | 0.791  | 0.439  | 0.781  |        | 0.912* | 0.88     | 0.523  | -0.231 | 0.503  | 0.882  | 0.745  | 0.824  |
|                      |            | CA2        | 0.188  | 0.111  | 0.654  | 0.447  |        | 0.826    | 0.771  | -0.111 | 0.691  | 0.94*  | 0.946  | 0.976* |
|                      |            | CA3        | 0.452  | 0.115  | 0.6    | 0.851  | 0.741  |          | 0.452  | 0.01   | 0.397  | 0.793  | 0.897  | 0.766  |
|                      | Nuc mHTT   | STR        | 0.537  | 0.602  | 0.43   | 0.474  | 0.036  | 0.073    |        | -0.114 | 0.814  | 0.471  | 0.163  | 0.858  |
|                      |            | CTX        | 0.387  | 0.675  | 0.154  | 0.176  | -0.188 | -0.188   | 0.85   |        | -0.005 | 0.051  | -0.05  | -0.004 |
|                      |            | DG         | 0.459  | 0.353  | 0.359  | 0.547  | 0.064  | 0.265    | 0.911* | 0.652  |        | 0.765  | 0.062  | 0.737  |
|                      |            | CA1        | 0.193  | 0.23   | 0.57   | 0.576  | 0.725  | 0.562    | 0.876  | 0.32   | 0.861  |        | 0.664  | 0.865  |
|                      |            | CA2        | -0.274 | -0.341 | -0.085 | 0.278  | 0.465  | 0.491    | 0.029  | -0.001 | 0.13   | 0.489  |        | 0.881  |
|                      |            | CA3        | 0.156  | -0.032 | 0.19   | 0.601  | 0.303  | 0.621    | 0.54   | 0.323  | 0.741  | 0.746  | 0.712  |        |
| R6/1 males & females | Total mHTT | STR        | -      | 0.571  | 0.652  | 0.673  | 0.52   | 0.651    | 0.593  | -0.066 | 0.462  | 0.443  | 0.31   | 0.503  |
|                      |            | CTX        | 0.571  | -      | 0.521  | 0.291  | -0.112 | 0.313    | 0.103  | 0.534  | 0.323  | 0.354  | 0.088  | -0.108 |
|                      |            | DG         | 0.652  | 0.521  | -      | 0.753* | 0.445  | 0.658    | 0.45   | 0.116  | 0.361  | 0.559  | 0.215  | 0.403  |
|                      |            | CA1        | 0.673  | 0.291  | 0.753* | -      | 0.753* | 0.852*   | 0.504  | -0.028 | 0.511  | 0.749  | 0.496  | 0.716  |
|                      |            | CA2        | 0.52   | -0.112 | 0.445  | 0.753* | -      | 0.784*   | 0.603  | -0.135 | 0.273  | 0.822* | 0.801* | 0.941* |
|                      |            | CA3        | 0.651  | 0.313  | 0.658  | 0.852* | 0.784* | -        | 0.355  | -0.065 | 0.288  | 0.688  | 0.732  | 0.722* |
|                      | Nuc mHTT   | STR        | 0.593  | 0.103  | 0.45   | 0.504  | 0.603  | 0.355    | -      | 0.298  | 0.825* | 0.566  | 0.113  | 0.764* |
|                      |            | CTX        | -0.066 | 0.534  | 0.116  | -0.028 | -0.135 | -0.065   | 0.298  | -      | 0.441  | 0.18   | -0.02  | 0.056  |
|                      |            | DG         | 0.462  | 0.323  | 0.361  | 0.511  | 0.273  | 0.288    | 0.825* | 0.441  | -      | 0.777* | 0.12   | 0.586  |
|                      |            | CA1        | 0.443  | 0.354  | 0.559  | 0.749  | 0.822* | 0.688    | 0.566  | 0.18   | 0.777* | -      | 0.539  | 0.804* |
|                      |            | CA2        | 0.31   | 0.088  | 0.215  | 0.496  | 0.801* | 0.732    | 0.113  | -0.02  | 0.12   | 0.539  | -      | 0.804* |
|                      |            | CA3        | 0.503  | -0.108 | 0.403  | 0.716  | 0.941* | 0.722*   | 0.764* | 0.056  | 0.586  | 0.804* | 0.804* | -      |

Pearson r value >0.5 >0.6 >0.7 >0.8
