# Supplementary material for: Correlations of Behavioral Deficits with Brain Pathology Assessed through Longitudinal MRI and Histopathology in the R6/1 Mouse Model of Huntington’s Disease
Source: PubMed Central journal article supplement (PMC3868608; doi:10.1371/journal.pone.0084726), 2013-12-19
Supplement: pone.0084726.s009.pdf [file pone.0084726.s009.pdf]

|                 |        | STR        |               |                | M1 CTX   |               |               |                   |        |
|-----------------|--------|------------|---------------|----------------|----------|---------------|---------------|-------------------|--------|
|                 |        | Neur no.   | Neur dens.    | Volume         | Neur no. | Neur dens.    | Volume        |                   |        |
| WT males        | STR    | Neur no.   | <b>0.876*</b> | 0.068          | 0.035    | 0.15          | -0.079        | WT females        |        |
|                 |        | Neur dens. | <b>0.949*</b> | -0.42          | 0.291    | 0.52          | -0.047        |                   |        |
|                 |        | Volume     | 0.653         | 0.383          | -0.558   | -0.787        | -0.089        |                   |        |
|                 | M1 CTX | Neur no.   | 0.259         | 0.23           | 0.217    |               | 0.668         |                   | 0.764  |
|                 |        | Neur dens. | 0.009         | 0.081          | -0.219   | 0.091         |               |                   | 0.032  |
|                 |        | Volume     | 0.143         | 0.078          | 0.272    | 0.736         | -0.602        |                   |        |
| R6/1 males      | STR    | Neur no.   |               | 0.825          | 0.638    | 0.652         | -0.392        | R6/1 females      |        |
|                 |        | Neur dens. | <b>0.927*</b> | <b>-0.869*</b> | 0.585    | <b>0.878*</b> | -0.666        |                   |        |
|                 |        | Volume     | 0.72          | 0.411          | -0.407   | -0.832        | 0.729         |                   |        |
|                 | M1 CTX | Neur no.   | 0.079         | 0.107          | -0.011   |               | 0.611         |                   | -0.116 |
|                 |        | Neur dens. | 0.333         | 0.616          | -0.288   | 0.592         |               |                   | -0.838 |
|                 |        | Volume     | -0.283        | -0.557         | 0.298    | 0.501         | -0.398        |                   |        |
| WT & R6/1 males | STR    | Neur no.   |               | 0.508          | 0.503    | 0.295         | 0.168         | WT & R6/1 females |        |
|                 |        | Neur dens. | <b>0.716*</b> | -0.622         | 0.166    | <b>0.77*</b>  | -0.518        |                   |        |
|                 |        | Volume     | <b>0.75*</b>  | 0.084          | 0.269    | -0.533        | <b>0.686*</b> |                   |        |
|                 | M1 CTX | Neur no.   | 0.442         | 0.15           | 0.498    |               | 0.392         |                   | 0.539  |
|                 |        | Neur dens. | -0.156        | 0.254          | -0.452   | -0.034        |               |                   | -0.55  |
|                 |        | Volume     | 0.416         | -0.053         | 0.651    | <b>0.785*</b> | -0.639        |                   |        |

Pearson r value >0.5 >0.6 >0.7 >0.8
