# Supplementary material for: Correlations of Behavioral Deficits with Brain Pathology Assessed through Longitudinal MRI and Histopathology in the R6/1 Mouse Model of Huntington’s Disease
Source: PubMed Central journal article supplement (PMC3868608; doi:10.1371/journal.pone.0084726), 2013-12-19
Supplement: pone.0084726.s010.pdf [file pone.0084726.s010.pdf]

|              |            | Volumetry |        |        |        |        | T2 relaxivity |        |        |        |        |        |
|--------------|------------|-----------|--------|--------|--------|--------|---------------|--------|--------|--------|--------|--------|
|              |            | STR       | CTX    | HIPP   | CC     | WB     | STR           | CTX    | HIPP   | CC     | MUSC   |        |
| Male R6/1s   | Total mHTT | STR       | 0.054  | 0.03   | -0.176 | -0.571 | 0.042         | 0.654  | 0.579  | 0.646  | -0.276 | 0.365  |
|              |            | CTX       | 0.268  | 0.179  | -0.259 | -0.486 | -0.129        | 0.767  | 0.809  | 0.788  | -0.374 | 0.33   |
|              |            | DG        | 0.233  | -0.169 | -0.555 | -0.579 | 0.059         | 0.264  | 0.2    | 0.452  | -0.303 | 0.382  |
|              |            | CA1       | -0.021 | -0.458 | -0.309 | -0.507 | 0.146         | 0.327  | 0.156  | 0.338  | 0.062  | 0.296  |
|              |            | CA2       | 0.587  | -0.163 | -0.554 | 0.018  | 0.319         | -0.23  | -0.465 | 0.116  | -0.434 | 0.043  |
|              | CA3        | 0.189     | -0.572 | -0.333 | -0.253 | 0.457  | 0.015         | -0.229 | 0.074  | 0.293  | 0.143  |        |
|              | Nuc mHTT   | STR       | -0.186 | -0.022 | -0.19  | -0.36  | -0.332        | 0.422  | 0.479  | 0.296  | -0.096 | 0.352  |
|              |            | CTX       | 0.058  | 0.209  | -0.006 | -0.091 | -0.291        | 0.692  | 0.715  | 0.543  | -0.207 | 0.196  |
|              |            | DG        | -0.24  | -0.093 | -0.106 | -0.311 | -0.128        | 0.182  | 0.2    | 0.004  | 0.152  | 0.292  |
|              |            | CA1       | 0.218  | -0.375 | -0.537 | -0.203 | 0.075         | -0.334 | -0.422 | -0.145 | 0.129  | 0.199  |
| CA2          |            | 0.129     | -0.615 | -0.191 | 0.356  | 0.153  | -0.149        | -0.419 | -0.105 | 0.279  | -0.129 |        |
| CA3          | -0.055     | -0.501    | -0.211 | 0.053  | 0.223  | -0.014 | -0.211        | -0.151 | 0.45   | 0.179  |        |        |
| Female R6/1s | Total mHTT | STR       | -0.634 | 0.125  | -0.26  | 0.156  | -0.169        | -0.622 | -0.65  | -0.563 | -0.217 | -0.003 |
|              |            | CTX       | -0.516 | -0.198 | -0.265 | -0.076 | 0.128         | 0.243  | 0.073  | 0.221  | 0.053  | 0.328  |
|              |            | DG        | -0.632 | 0.024  | -0.674 | -0.035 | -0.302        | -0.284 | -0.401 | -0.434 | -0.258 | -0.385 |
|              |            | CA1       | -0.228 | 0.004  | -0.2   | 0.558  | -0.415        | -0.454 | -0.649 | -0.279 | -0.058 | -0.149 |
|              |            | CA2       | -0.309 | 0.097  | -0.219 | 0.561  | -0.251        | -0.599 | -0.737 | -0.572 | -0.276 | -0.202 |
|              | CA3        | -0.528    | -0.074 | -0.464 | 0.319  | -0.268 | -0.28         | -0.451 | -0.27  | -0.08  | -0.016 |        |
|              | Nuc mHTT   | STR       | -0.209 | 0.543  | 0.034  | 0.466  | 0.172         | -0.727 | -0.716 | -0.809 | -0.352 | -0.132 |
|              |            | CTX       | -0.103 | 0.024  | -0.179 | -0.071 | 0.571         | 0.533  | 0.366  | 0.165  | -0.467 | -0.179 |
|              |            | DG        | -0.012 | 0.588  | 0.332  | 0.223  | 0.335         | -0.455 | -0.804 | -0.538 | -0.359 | -0.269 |
|              |            | CA1       | -0.096 | 0.172  | 0.056  | 0.303  | -0.021        | -0.195 | -0.687 | -0.229 | -0.118 | -0.155 |
| CA2          |            | -0.63     | -0.189 | -0.895 | -0.375 | -0.528 | 0.169         | 0.147  | 0.178  | 0.467  | -0.171 |        |
| CA3          | -0.29      | 0.232     | -0.202 | 0.567  | -0.099 | -0.59  | -0.69         | -0.628 | -0.313 | -0.189 |        |        |

Pearson r value >0.5 >0.6 >0.7 >0.8
