# Supplementary material for: Correlations of Behavioral Deficits with Brain Pathology Assessed through Longitudinal MRI and Histopathology in the R6/1 Mouse Model of Huntington’s Disease
Source: PubMed Central journal article supplement (PMC3868608; doi:10.1371/journal.pone.0084726), 2013-12-19
Supplement: pone.0084726.s011.pdf [file pone.0084726.s011.pdf]

|           |         |        | Volumetry  |                |               |                      |               | T2 relaxivity        |               |               |               |               |               |
|-----------|---------|--------|------------|----------------|---------------|----------------------|---------------|----------------------|---------------|---------------|---------------|---------------|---------------|
|           |         |        | STR        | CTX            | HIPP          | CC                   | WB            | STR                  | CTX           | HIPP          | CC            | MUSC          |               |
| WT        | Males   | STR    | Neur no.   | -0.05          | 0.129         | 0.246                | -0.208        | -0.043               | -0.356        | -0.364        | -0.382        | -0.574        | -0.252        |
|           |         |        | Neur dens. | -0.036         | 0.163         | 0.147                | -0.206        | -0.004               | -0.389        | -0.435        | -0.475        | -0.512        | -0.225        |
|           |         |        | Volume     | 0.008          | 0.077         | 0.342                | -0.109        | -0.049               | -0.17         | -0.071        | -0.036        | -0.519        | -0.239        |
|           |         | M1 CTX | Neur no.   | -0.184         | 0.002         | 0.34                 | 0.41          | 0.566                | -0.432        | -0.588        | -0.274        | -0.37         | -0.686        |
|           |         |        | Neur dens. | <b>-0.874*</b> | -0.675        | 0.083                | 0.216         | -0.233               | 0.199         | -0.061        | -0.228        | 0.157         | -0.149        |
|           |         |        | Volume     | 0.423          | 0.442         | 0.237                | 0.173         | 0.62                 | -0.429        | -0.385        | -0.032        | -0.356        | -0.42         |
|           | Females | STR    | Neur no.   | <i>-0.082</i>  | <i>-0.124</i> | <i>0.243</i>         | <i>-0.319</i> | <i>-0.121</i>        | <i>-0.23</i>  | <i>-0.222</i> | <i>-0.133</i> | <i>-0.71</i>  | <i>-0.26</i>  |
|           |         |        | Neur dens. | <i>-0.238</i>  | <i>-0.172</i> | <i>0.223</i>         | <i>-0.372</i> | <i>-0.012</i>        | <i>-0.139</i> | <i>-0.079</i> | <i>0.019</i>  | <i>-0.758</i> | <i>-0.221</i> |
|           |         |        | Volume     | <i>0.315</i>   | <i>0.101</i>  | <i>-0.054</i>        | <i>0.161</i>  | <i>-0.207</i>        | <i>-0.087</i> | <i>-0.216</i> | <i>-0.273</i> | <i>0.248</i>  | <i>0.017</i>  |
|           |         | M1 CTX | Neur no.   | <i>-0.085</i>  | <i>-0.282</i> | <i>-0.135</i>        | <i>-0.65</i>  | <i>-0.234</i>        | <i>0.207</i>  | <i>0.209</i>  | <i>0.539</i>  | <i>-0.331</i> | <i>-0.099</i> |
|           |         |        | Neur dens. | <i>-0.141</i>  | <i>-0.079</i> | <i>-0.034</i>        | <i>-0.491</i> | <i>-0.104</i>        | <i>0.289</i>  | <i>0.515</i>  | <i>0.614</i>  | <i>-0.57</i>  | <i>-0.003</i> |
|           |         |        | Volume     | <i>0.021</i>   | <i>-0.29</i>  | <i>-0.115</i>        | <i>-0.436</i> | <i>-0.192</i>        | <i>-0.09</i>  | <i>-0.185</i> | <i>0.019</i>  | <i>0.203</i>  | <i>-0.129</i> |
| R6/1      | Males   | STR    | Neur no.   | 0.144          | -0.156        | 0.137                | 0.287         | 0.564                | 0.489         | 0.164         | 0.246         | 0.36          | 0.134         |
|           |         |        | Neur dens. | -0.077         | -0.115        | 0.219                | 0.347         | 0.53                 | 0.257         | -0.025        | -0.031        | 0.435         | 0.146         |
|           |         |        | Volume     | 0.544          | -0.128        | -0.103               | 0.06          | 0.427                | 0.692         | 0.418         | 0.644         | 0.056         | 0.071         |
|           |         | M1 CTX | Neur no.   | -0.146         | -0.096        | 0.404                | -0.458        | -0.327               | -0.141        | -0.227        | 0.084         | -0.327        | -0.636        |
|           |         |        | Neur dens. | -0.294         | 0.001         | 0.355                | 0.05          | 0.184                | -0.586        | -0.758        | -0.534        | 0.154         | -0.261        |
|           |         |        | Volume     | 0.155          | -0.106        | 0.073                | -0.604        | -0.573               | 0.44          | 0.545         | 0.646         | -0.526        | -0.448        |
|           | Females | STR    | Neur no.   | <i>-0.367</i>  | <i>-0.245</i> | <i>-0.42</i>         | <i>-0.128</i> | <i>-0.369</i>        | <i>-0.109</i> | <i>-0.434</i> | <i>-0.293</i> | <i>-0.312</i> | <i>-0.471</i> |
|           |         |        | Neur dens. | <i>-0.197</i>  | <i>-0.073</i> | <i>-0.504</i>        | <i>0.068</i>  | <i>-0.511</i>        | <i>-0.168</i> | <i>-0.352</i> | <i>-0.254</i> | <i>-0.18</i>  | <i>-0.616</i> |
|           |         |        | Volume     | <i>-0.083</i>  | <i>-0.107</i> | <i>0.462</i>         | <i>-0.06</i>  | <i>0.554</i>         | <i>0.021</i>  | <i>0.069</i>  | <i>0.005</i>  | <i>-0.084</i> | <i>0.636</i>  |
|           |         | M1 CTX | Neur no.   | <i>-0.668</i>  | <i>-0.122</i> | <i>-0.828</i>        | <i>-0.309</i> | <i>-0.438</i>        | <i>-0.002</i> | <i>-0.042</i> | <i>-0.096</i> | <i>0.184</i>  | <i>-0.207</i> |
|           |         |        | Neur dens. | <i>-0.086</i>  | <i>-0.018</i> | <i>-0.494</i>        | <i>0.15</i>   | <i>-0.533</i>        | <i>-0.122</i> | <i>-0.206</i> | <i>-0.145</i> | <i>0.208</i>  | <i>-0.257</i> |
|           |         |        | Volume     | <i>-0.354</i>  | <i>0.013</i>  | <i>0.111</i>         | <i>-0.231</i> | <i>0.392</i>         | <i>0.026</i>  | <i>0.089</i>  | <i>0.039</i>  | <i>-0.293</i> | <i>0.131</i>  |
| WT & R6/1 | Males   | STR    | Neur no.   | 0.423          | 0.485         | 0.562                | 0.126         | 0.546                | 0.215         | -0.143        | -0.176        | -0.161        | -0.137        |
|           |         |        | Neur dens. | -0.111         | -0.052        | 0.01                 | -0.006        | 0.003                | -0.124        | -0.235        | -0.199        | -0.191        | -0.038        |
|           |         |        | Volume     | <b>0.727*</b>  | <b>0.752*</b> | <b>0.794*</b>        | 0.219         | <b>0.803*</b>        | 0.442         | 0.022         | -0.059        | -0.02         | -0.146        |
|           |         | M1 CTX | Neur no.   | 0.242          | 0.397         | 0.572                | 0.269         | 0.59                 | -0.015        | -0.387        | -0.184        | -0.25         | -0.577        |
|           |         |        | Neur dens. | <b>-0.7*</b>   | -0.571        | -0.241               | 0.062         | -0.394               | -0.236        | -0.288        | -0.258        | 0.094         | -0.155        |
|           |         |        | Volume     | 0.621          | <b>0.667*</b> | 0.603                | 0.157         | <b>0.709*</b>        | 0.145         | -0.111        | 0.007         | -0.209        | -0.326        |
|           | Females | STR    | Neur no.   | <i>0.232</i>   | <i>0.32</i>   | <i>0.427</i>         | <i>-0.025</i> | <i>0.329</i>         | <i>0.036</i>  | <i>-0.211</i> | <i>-0.3</i>   | <i>-0.346</i> | <i>-0.395</i> |
|           |         |        | Neur dens. | <i>-0.318</i>  | <i>-0.263</i> | <i>-0.344</i>        | <i>-0.234</i> | <i>-0.389</i>        | <i>-0.226</i> | <i>-0.272</i> | <i>-0.077</i> | <i>-0.488</i> | <i>-0.327</i> |
|           |         |        | Volume     | <i>0.561</i>   | <i>0.596</i>  | <b><i>0.753*</i></b> | <i>0.309</i>  | <b><i>0.728*</i></b> | <i>0.251</i>  | <i>0.045</i>  | <i>-0.267</i> | <i>0.273</i>  | <i>0.008</i>  |
|           |         | M1 CTX | Neur no.   | <i>0.214</i>   | <i>0.362</i>  | <i>0.328</i>         | <i>-0.182</i> | <i>0.358</i>         | <i>0.285</i>  | <i>0.113</i>  | <i>-0.017</i> | <i>0.044</i>  | <i>-0.248</i> |
|           |         |        | Neur dens. | <i>-0.11</i>   | <i>-0.068</i> | <i>-0.249</i>        | <i>-0.119</i> | <i>-0.283</i>        | <i>-0.022</i> | <i>-0.039</i> | <i>0.062</i>  | <i>-0.136</i> | <i>-0.127</i> |
|           |         |        | Volume     | <i>0.267</i>   | <i>0.381</i>  | <i>0.509</i>         | <i>-0.029</i> | <i>0.559</i>         | <i>0.182</i>  | <i>0.048</i>  | <i>-0.12</i>  | <i>0.141</i>  | <i>-0.126</i> |

Pearson r value >0.5 >0.6 >0.7 >0.8
