# Supplementary material for: Correlations of Behavioral Deficits with Brain Pathology Assessed through Longitudinal MRI and Histopathology in the R6/1 Mouse Model of Huntington’s Disease
Source: PubMed Central journal article supplement (PMC3868608; doi:10.1371/journal.pone.0084726), 2013-12-19
Supplement: pone.0084726.s012.pdf [file pone.0084726.s012.pdf]

|            |     | Male R6/1s |        |        |        |        | Female R6/1s |        |        |        |        |
|------------|-----|------------|--------|--------|--------|--------|--------------|--------|--------|--------|--------|
|            |     | LMA        | GS FL  | GS 4L  | TM CL  | TM CR  | LMA          | GS FL  | GS 4L  | TM CL  | TM CR  |
| Total mHTT | STR | 0.16       | 0.179  | -0.042 | 0.154  | -0.327 | 0.274        | -0.367 | 0.511  | 0.396  | -0.646 |
|            | CTX | 0.148      | -0.431 | -0.281 | -0.051 | -0.562 | -0.012       | 0.318  | 0.445  | 0.128  | -0.225 |
|            | DG  | -0.107     | 0.2    | 0.055  | 0.24   | -0.098 | -0.355       | 0.205  | 0.337  | 0.374  | -0.07  |
|            | CA1 | 0.014      | 0.494  | 0.092  | 0.519  | 0.308  | 0.293        | 0.072  | 0.472  | 0.142  | -0.303 |
|            | CA2 | -0.038     | 0.182  | -0.181 | 0.709  | 0.47   | 0.219        | 0.184  | 0.664  | 0.14   | -0.286 |
|            | CA3 | -0.131     | 0.591  | 0.099  | 0.79   | 0.547  | 0.007        | 0.321  | 0.476  | 0.163  | -0.204 |
| Nuc mHTT   | STR | 0.23       | -0.172 | -0.301 | -0.278 | -0.013 | 0.246        | -0.145 | 0.677  | 0.269  | -0.324 |
|            | CTX | 0.464      | -0.593 | -0.589 | -0.245 | -0.222 | -0.577       | 0.79   | 0.247  | -0.05  | 0.551  |
|            | DG  | 0.109      | 0.133  | -0.234 | -0.163 | 0.206  | 0.442        | -0.202 | 0.872  | 0.021  | -0.516 |
|            | CA1 | -0.221     | 0.118  | -0.16  | 0.244  | 0.514  | 0.365        | 0.18   | 0.77   | -0.209 | -0.377 |
|            | CA2 | 0.215      | 0.136  | -0.199 | 0.653  | 0.925* | -0.484       | 0.14   | -0.073 | 0.573  | 0.122  |
|            | CA3 | 0.186      | 0.324  | -0.271 | 0.398  | 0.781  | 0.109        | 0.289  | 0.717  | 0.18   | -0.195 |

Pearson r value >0.5 >0.6 >0.7 >0.8
