# Supplementary material for: Correlations of Behavioral Deficits with Brain Pathology Assessed through Longitudinal MRI and Histopathology in the R6/1 Mouse Model of Huntington’s Disease
Source: PubMed Central journal article supplement (PMC3868608; doi:10.1371/journal.pone.0084726), 2013-12-19
Supplement: pone.0084726.s013.pdf [file pone.0084726.s013.pdf]

|             |        |            | Male   |        |        |        |        | Female |        |        |         |        |
|-------------|--------|------------|--------|--------|--------|--------|--------|--------|--------|--------|---------|--------|
|             |        |            | LMA    | GS FL  | GS 4L  | TM CL  | TM CR  | LMA    | GS FL  | GS 4L  | TM CL   | TM CR  |
| WTs         | STR    | Neur no.   | 0.211  | 0.024  | -0.15  | 0.762  | 0.115  | -0.555 | 0.167  | 0.103  | 0.222   | -0.274 |
|             |        | Neur dens. | 0.284  | -0.068 | -0.243 | 0.71   | 0.071  | -0.335 | 0.134  | 0.432  | 0.236   | -0.51  |
|             |        | Volume     | -0.015 | 0.209  | 0.147  | 0.5    | 0.151  | -0.335 | -0.015 | -0.701 | -0.074  | 0.483  |
|             | M1 CTX | Neur no.   | 0.191  | -0.487 | -0.291 | -0.225 | 0.509  | -0.16  | 0.262  | 0.092  | 0.022   | -0.246 |
|             |        | Neur dens. | -0.252 | -0.353 | -0.709 | -0.151 | 0.191  | 0.061  | -0.107 | 0.499  | -0.007  | -0.42  |
|             |        | Volume     | 0.347  | -0.125 | 0.28   | -0.116 | 0.286  | -0.267 | 0.48   | -0.27  | 0.071   | 0.032  |
| R6/1s       | STR    | Neur no.   | 0.569  | 0.234  | -0.446 | 0.556  | 0.328  | -0.085 | 0.243  | 0.368  | -0.134  | -0.175 |
|             |        | Neur dens. | 0.536  | 0.424  | -0.321 | 0.355  | 0.371  | -0.354 | 0.267  | 0.069  | 0.149   | 0.126  |
|             |        | Volume     | 0.393  | -0.212 | -0.546 | 0.687  | 0.098  | 0.544  | -0.163 | 0.37   | -0.333  | -0.432 |
|             | M1 CTX | Neur no.   | -0.355 | 0.459  | 0.409  | 0.45   | 0.389  | -0.405 | 0.143  | 0.048  | 0.415   | 0.035  |
|             |        | Neur dens. | -0.09  | 0.769  | 0.217  | 0.159  | 0.447  | -0.277 | 0.436  | -0.085 | 0.033   | 0.251  |
|             |        | Volume     | -0.35  | -0.304 | 0.23   | 0.329  | -0.145 | 0.099  | -0.494 | 0.25   | 0.337   | -0.369 |
| WTs & R6/1s | STR    | Neur no.   | 0.524  | 0.412  | 0.208  | 0.446  | -0.213 | -0.329 | 0.468  | 0.529  | -0.351  | -0.468 |
|             |        | Neur dens. | 0.282  | 0.028  | -0.273 | 0.532  | 0.336  | -0.333 | 0.071  | 0.043  | 0.298   | 0.101  |
|             |        | Volume     | 0.503  | 0.58   | 0.546  | 0.117  | -0.593 | 0.028  | 0.442  | 0.518  | -0.652* | -0.541 |
|             | M1 CTX | Neur no.   | 0.31   | 0.118  | 0.258  | -0.1   | -0.141 | -0.212 | 0.508  | 0.521  | -0.304  | -0.434 |
|             |        | Neur dens. | -0.369 | -0.251 | -0.511 | 0.06   | 0.473  | -0.139 | 0.252  | 0.141  | 0.059   | 0.122  |
|             |        | Volume     | 0.48*  | 0.293  | 0.55   | -0.128 | -0.398 | -0.071 | 0.272  | 0.418  | -0.255  | -0.516 |

Pearson r value >0.5 >0.6 >0.7 >0.8
